# Supplementary material for: Facilitators of and barriers to buprenorphine initiation for people with opioid use disorder in the emergency department: protocol for a scoping review
Source: HighWire-hosted journal article supplement (doi:10.1136/bmjopen-2021-053207), 2021-09-01
Supplement: bmjopen-2021-053207supp001_data_supplement.pdf [file bmjopen-2021-053207supp001_data_supplement.pdf]

## Appendix 1. search strategies for scoping review

**Medline (including Epub Ahead of Print, In-Process & Other Non-Indexed Citations)**

- 1 Buprenorphine/
- 2 Buprenorphine, Naloxone Drug Combination/
- 3 (buprenorphine or burprex or suboxone or brixadi or bunavail or buprenex or butrans or buvidal or cizdol or norspan or prefin or probuphine or sublocade or subutex or temgesic or zubsolv).ti,ab,kf.
- 4 or/1-3
- 5 Opiate Substitution Treatment/
- 6 ((opioid\* or opiate\*) adj3 (replacement or substitution or maintenance)).ti,ab,kf.
- 7 ((opioid\* or opiate\*) adj3 (maintenance or substitution or replacement) adj3 (treatment or therap\*)).ti,ab,kf.
- 8 (Opioid agonist\* adj3 (treatment\* or therap\*)).ti,ab,kf.
- 9 ((medica\* assisted or opioid assisted) adj3 (treatment\* or therap\*)).ti,ab,kf. (910)
- 10 or/5-9
- 11 exp Opioid-Related Disorders/
- 12 ((opioid\* or opiate\* or abstral or atasol or avinza or buprenorphine or butorphanol or butrans or coactifed or codeine or cotridin or covan or demerol or dextropropoxyphene or dihydrocodeine or dilaudid or diphenoxylate or doloral or duragesic or durela or empracet or emtec or endocet or endodan or fentanil or fentanyl or fentora or fiorinal or heroin or hycodan or hydrocodone or hydromorph\* or jurnista or kadian or lenoltec or levorphanol or lomotil or lorcet or lortab or meperidine or "m-eslon" or metadol or methado or methadone or morphine or "ms contin" or "ms-ir" or nalbuphine or novahist or nubain or nucynta or opana or "oxy.ir" or oxyco or oxycodone or oxycontin or "oxy-ir" or oxymorphone or oxyneo or pentazocine or percocet or percodan or pethidine or procet or propoxyphene or ralivia or rivacocet or sepeudol or stadol or statex or suboxone or talwin or tapentadol or targin or tecnal or tramacet or tramadol or tridural or tussionex or ultram or vicodin or zytram) adj3 (depend\* or disorder\* or "use" or user\* or using or misus\* or abuse\* or abusi\* or addict\* or withdraw\* or overdos\* or postoverdos\*)).ti,ab,kf,hw.
- 13 ((overdos\* or postoverdos\*) and (opioid\* or opiate\*)).ti,ab,kf,hw.
- 14 ((initiat\* or pathway\* or enroll\* or start\* or accept\* or reject\* or refus\* or consider\* or link\* or facilitat\* or access\* or connect\* or discuss\* or conversation\* or present\* or admit\* or admission\* or administer\* or deliver\*) adj5 (care or treat\* or therap\* or service\* or intervention\* or program\*)).ti,ab,kf,hw.
- 15 ((implement\* or initiat\* or induction) adj3 pathway\*).ti,ab,kf,hw.
- 16 ((barrier\* or facilitat\*) adj3 (care or treat\* or therap\* or pathway\* or service\* or intervention\* or program\*)).ti,ab,kf,hw.

- 17 harm reduction.ti,ab,kf,hw.
- 18 ((patient\* or user\*) adj3 (experience\* or perspective\* or opinion\* or view\* or attitude\* or voice\* or feedback)).ti,ab,kf.
- 19 (11 or 12 or 13) and (14 or 15 or 16 or 17 or 18)
- 20 ((opioid\* or opiate\*) adj3 (disorder\* or depend\* or withdraw\* or overdos\* or postoverdos\*) adj5 treat\*).ti,ab,kf.
- 21 Emergency medical services/
- 22 exp Emergency Service, Hospital/
- 23 emergency medicine/
- 24 emergency nursing/
- 25 emergency adj3 (department\* or ward\* or unit\* or room\* or service\* or medicine or center\* or centre\* or clinic or clinics or hospital\* or care or visit\* or patient\*).ti,ab,kf,hw.
- 26 (casualty adj1 (department\* or ward\* or unit\* or room\* or service\* or medicine or center\* or centre\* or clinic or clinics or hospital\* or visit\* or patient\*).ti,ab,kf.
- 27 "a&e".ti,ab,kf.
- 28 or/21-27
- 29 4 or 10 or 19 or 20
- 30 28 and 29
- 31 limit 30 to yr="1995 -Current"
- 32 naloxone.ab. /freq=4 not (buprenorphine or suboxone or ((replacement or substitution or maintenance or assisted) adj1 (treatment\* or therap\*))).ab.
- 33 31 not 32

## Embase

- 1 Buprenorphine/ (19176)
- 2 buprenorphine plus naloxone/ (2024)
- 3 (buprenorphine or burprex or suboxone or brixadi or bunavail or buprenex or butrans or buvidal or cizdol or norspan or prefin or probuphine or sublocade or subutex or temgesic or subsolv).ti,ab,kw. (11061)
- 4 or/1-3 (20923)
- 5 Opiate Substitution Treatment/ (2606)
- 6 ((opioid\* or opiate\*) adj3 (replacement or substitution or maintenance)).ti,ab,kw. (3878)
- 7 ((opioid\* or opiate\*) adj3 (maintenance or substitution or replacement) adj3 (treatment or therap\*)).ti,ab,kw. (3006)
- 8 (Opioid agonist\* adj3 (treatment\* or therap\*)).ti,ab,kw. (1121)
- 9 ((medica\* assisted or opioid assisted) adj3 (treatment\* or therap\*)).ti,ab,kw. (1306)

- 10 or/5-9 (7092)
- 11 exp Opioid-Related Disorders/ (22335)
- 12 ((opiod\* or opiate\* or abstral or atasol or avinza or buprenorphine or butorphanol or butrans or coactifed or codeine or cotridin or covan or demerol or dextropropoxyphene or dihydrocodeine or dilaudid or diphenoxylate or doloral or duragesic or durela or empracet or emtec or endocet or endodan or fentanil or fentanyl or fentora or fiorinal or heroin or hycodan or hydrocodone or hydromorph\* or jurnista or kadian or lenoltec or levorphanol or lomotil or lorcet or lortab or meperidine or "m-eslon" or metadol or methado or methadone or morphine or "ms contin" or "ms-ir" or nalbuphine or novahist or nubain or nucynta or opana or "oxy.ir" or oxyco or oxycodone or oxycontin or "oxy-ir" or oxymorphone or oxyneo or pentazocine or percocet or percodan or pethidine or procet or propoxyphene or ralivia or rivacocet or sepeudol or stadol or statex or suboxone or talwin or tapentadol or targin or tecnal or tramacet or tramadol or tridural or tussionex or ultram or vicodin or zytram) adj3 (depend\* or disorder\* or "use" or user\* or using or misus\* or abuse\* or abusi\* or addict\* or withdraw\* or overdos\* or postoverdos\*).ti,ab,kw,hw. (85627)
- 13 ((overdos\* or postoverdos\*) and (opiod\* or opiate\*)).ti,ab,kw,hw. (9993)
- 14 ((initiat\* or pathway\* or enroll\* or start\* or accept\* or reject\* or refus\* or consider\* or link\* or facilitat\* or access\* or connect\* or discuss\* or conversation\* or present\* or admit\* or admission\* or administer\* or deliver\*) adj5 (care or treat\* or therap\* or service\* or intervention\* or program\*)).ti,ab,kw,hw. (1926168)
- 15 ((implement\* or initiat\* or induction) adj3 pathway\*).ti,ab,kw,hw. (14049)
- 16 ((barrier\* or facilitat\*) adj3 (care or treat\* or therap\* or pathway\* or service\* or intervention\* or program\*)).ti,ab,kw,hw. (67390)
- 17 harm reduction.ti,ab,kw,hw. (10217)
- 18 ((patient\* or user\*) adj3 (experience\* or perspective\* or opinion\* or view\* or attitude\* or voice\* or feedback)).ti,ab,kw. (299347)
- 19 (11 or 12 or 13) and (14 or 15 or 16 or 17 or 18) (15800)
- 20 ((opiod\* or opiate\*) adj3 (disorder\* or depend\* or withdraw\* or overdos\* or postoverdos\*) adj5 treat\*).ti,ab,kw. (5977)
- 21 emergency health service/ (105637)
- 22 Hospital emergency service/ (6034)
- 23 Emergency ward/ (159716)
- 24 emergency medicine/ (42355)
- 25 emergency nursing/ (6700)
- 26 (emergency adj3 (department\* or ward\* or unit\* or room\* or service\* or medicine or center\* or centre\* or clinic or clinics or hospital\* or care or visit\* or patient\*)).ti,ab,kw,hw. (408745)
- 27 (casualty adj1 (department\* or ward\* or unit\* or room\* or service\* or medicine or center\* or centre\* or clinic or clinics or hospital\* or visit\* or patient\*)).ti,ab,kw. (1337)
- 28 "a&e".ti,ab,kw. (49718)

- 29 or/21-28 (460398)
- 30 4 or 10 or 19 or 20 (38258)
- 31 29 and 30 (2140)
- 32 limit 31 to yr="1995 -Current" (2106)
- 33 naloxone.ab. /freq=4 not (buprenorphine or suboxone or ((replacement or substitution or maintenance or assisted) adj1 (treatment\* or therap\*))).ab. (4626)
- 34 32 not 33 (1951)

### APA PsycInfo

- 1 Buprenorphine/ (1933)
- 2 (buprenorphine or burprex or suboxone or brixadi or bunavail or buprenex or butrans or buvidal or cizdol or norspan or prefin or probuphine or sublocade or subutex or temgesic or zubsolv).ti,ab,id. (3104)
- 3 1 or 2 (3108)
- 4 Medication-Assisted Treatment/ (200)
- 5 ((opioid\* or opiate\*) adj3 (replacement or substitution or maintenance)).ti,ab,id. (1544)
- 6 ((opioid\* or opiate\*) adj3 (maintenance or substitution or replacement) adj3 (treatment or therap\*)).ti,ab,id. (1176)
- 7 (Opioid agonist\* adj3 (treatment\* or therap\*)).ti,ab,id. (455)
- 8 ((medica\* assisted or opioid assisted) adj3 (treatment\* or therap\*)).ti,ab,id. (554)
- 9 or/4-8 (2441)
- 10 exp "Opioid use Disorder"/ (3685)
- 11 ((opioid\* or opiate\* or abstral or atasol or avinza or buprenorphine or butorphanol or butrans or coactifed or codeine or cotridin or covan or demerol or dextropropoxyphene or dihydrocodeine or dilaudid or diphenoxylate or doloral or duragesic or durela or empracet or emtec or endocet or endodan or fentanil or fentanyl or fentora or fiorinal or heroin or hycodan or hydrocodone or hydromorph\* or jurnista or kadian or lenoltec or levorphanol or lomotil or lorcet or lortab or meperidine or "m-eslon" or metadol or methado or methadone or morphine or "ms contin" or "ms-ir" or nalbuphine or novahist or nubain or nucynta or opana or "oxy.ir" or oxyco or oxycodone or oxycontin or "oxy-ir" or oxymorphone or oxyneo or pentazocine or percocet or percodan or pethidine or procet or propoxyphene or ralivia or rivacocet or sepeudol or stadol or statex or suboxone or talwin or tapentadol or targin or tecnal or tramacet or tramadol or tridural or tussionex or ultram or vicodin or zytram) adj3 (depend\* or disorder\* or "use" or user\* or using or misus\* or abuse\* or abusi\* or addict\* or withdraw\* or overdos\* or postoverdos\*)).ti,ab,id,hw. (21980)
- 12 ((overdos\* or postoverdos\*) and (opioid\* or opiate\*)).ti,ab,id,hw. (2228)

- 13 ((initiat\* or pathway\* or enroll\* or start\* or accept\* or reject\* or refus\* or consider\* or link\* or facilitat\* or access\* or connect\* or discuss\* or conversation\* or present\* or admit\* or admission\* or administer\* or deliver\*) adj5 (care or treat\* or therap\* or service\* or intervention\* or program\*)).ti,ab,id,hw. (331164)
- 14 ((implement\* or initiat\* or induction) adj3 pathway\*).ti,ab,id,hw. (505)
- 15 ((barrier\* or facilitat\*) adj3 (care or treat\* or therap\* or pathway\* or service\* or intervention\* or program\*)).ti,ab,id,hw. (24780)
- 16 harm reduction.ti,ab,id,hw. (5519)
- 17 ((patient\* or user\*) adj3 (experience\* or perspective\* or opinion\* or view\* or attitude\* or voice\* or feedback)).ti,ab,id,hw. (43129)
- 18 (10 or 11 or 12) and (13 or 14 or 15 or 16 or 17) (4879)
- 19 ((opioid\* or opiate\*) adj3 (disorder\* or depend\* or withdraw\* or overdos\* or postoverdos\*) adj5 treat\*).ti,ab,id. (2736)
- 20 Emergency services/ (8805)
- 21 emergency medicine/ (354)
- 22 (emergency adj3 (department\* or ward\* or unit\* or room\* or service\* or medicine or center\* or centre\* or clinic or clinics or hospital\* or care or visit\* or patient\*)).ti,ab,id,hw. (20101)
- 23 (casualty adj1 (department\* or ward\* or unit\* or room\* or service\* or medicine or center\* or centre\* or clinic or clinics or hospital\* or visit\* or patient\*)).ti,ab,id. (68)
- 24 "a&e".ti,ab,id. (1749)
- 25 or/20-24 (21776)
- 26 3 or 9 or 18 or 19 (9049)
- 27 25 and 26 (242)
- 28 limit 27 to yr="2010 -Current" (204)
- 29 naloxone.ab. /freq=4 not (buprenorphine or suboxone or ((replacement or substitution or maintenance or assisted) adj1 (treatment\* or therap\*))).ab. (816)
- 30 28 not 29 (183)

## CINAHL

|   |                                                                                                                                                                                            |      |
|---|--------------------------------------------------------------------------------------------------------------------------------------------------------------------------------------------|------|
| 1 | MH Buprenorphine                                                                                                                                                                           | 3549 |
| 2 | (buprenorphine or burprex or suboxone or brixadi or bunavail or buprenex or butrans or buvidal or cizdol or norspan or prefinor probuphine or sublocade or subutex or temgesic or zubsolv) | 4694 |
| 3 | S1 OR S2                                                                                                                                                                                   | 4694 |
| 4 | ((opioid* or opiate*) n3 (replacement or substitution or maintenance))                                                                                                                     | 1364 |
| 5 | ((opioid* or opiate*) n3 (maintenance or substitution or replacement) n3 (treatment or therap*))                                                                                           | 1106 |

|    |                                                                                                                                                                                                                                                                                                                                                                                                                                                                                                                                                                                                                                                                                                                                                                                                                                                                                                                                                                                                                                                                                                                                                                   |         |
|----|-------------------------------------------------------------------------------------------------------------------------------------------------------------------------------------------------------------------------------------------------------------------------------------------------------------------------------------------------------------------------------------------------------------------------------------------------------------------------------------------------------------------------------------------------------------------------------------------------------------------------------------------------------------------------------------------------------------------------------------------------------------------------------------------------------------------------------------------------------------------------------------------------------------------------------------------------------------------------------------------------------------------------------------------------------------------------------------------------------------------------------------------------------------------|---------|
| 6  | (Opioid agonist* n3 (treatment* or therap*))                                                                                                                                                                                                                                                                                                                                                                                                                                                                                                                                                                                                                                                                                                                                                                                                                                                                                                                                                                                                                                                                                                                      | 509     |
| 7  | ((medica* assisted or opioid assisted) n3 (treatment* or therap*))                                                                                                                                                                                                                                                                                                                                                                                                                                                                                                                                                                                                                                                                                                                                                                                                                                                                                                                                                                                                                                                                                                | 778     |
| 8  | S4 OR S5 OR S6 OR S7                                                                                                                                                                                                                                                                                                                                                                                                                                                                                                                                                                                                                                                                                                                                                                                                                                                                                                                                                                                                                                                                                                                                              | 2,571   |
| 9  | ((opioid* or opiate* or abstral or atasol or avinza or buprenorphine or butorphanol or butrans or coactifed or codeine or cotridin or covan or demerol or dextropropoxyphene or dihydrocodeine or dilaudid or diphenoxylate or doloral or duragesic or durela or empracet or emtec or endocet or endodan or fentanil or fentanyl or fentora or fiorinal or heroin or hycodan or hydrocodone or hydromorph* or jurnista or kadian or lenoltec or levorphanol or lomotil or lorcet or lortab or meperidine or "m-eslon" or metadol or methado or methadone or morphine or "ms contin" or "ms-ir" or nalbuphine or novahist or nubain or nucynta or opana or "oxy.ir" or oxyco or oxycodone or oxycontin or "oxy-ir" or oxymorphone or oxyneo or pentazocine or percocet or percodan or pethidine or procet or propoxyphene or ralivia or rivacocet or sepeudol or stadol or statex or suboxone or talwin or tapentadol or targin or tecnal or tramacet or tramadol or tridural or tussionex or ultram or vicodin or zytram) n3 (depend* or disorder* or "use" or user* or using or misus* or abuse* or abusi* or addict* or withdraw* or overdos* or postoverdos*)) | 31,498  |
| 10 | ((overdos* or postoverdos*) and (opioid* or opiate*))                                                                                                                                                                                                                                                                                                                                                                                                                                                                                                                                                                                                                                                                                                                                                                                                                                                                                                                                                                                                                                                                                                             | 4,552   |
| 11 | ((initiat* or pathway* or enroll* or start* or accept* or reject* or refus* or consider* or link* or facilitat* or access* or connect* or discuss* or conversation* or present* or admit* or admission* or administer* or deliver*) n5 (care or treat* or therap* or service* or intervention* or program*))                                                                                                                                                                                                                                                                                                                                                                                                                                                                                                                                                                                                                                                                                                                                                                                                                                                      | 565,906 |
| 12 | ((implement* or initiat* or induction) n3 pathway*)                                                                                                                                                                                                                                                                                                                                                                                                                                                                                                                                                                                                                                                                                                                                                                                                                                                                                                                                                                                                                                                                                                               | 1,632   |
| 13 | ((barrier* or facilitat*) n3 (care or treat* or therap* or pathway* or service* or intervention* or program*))                                                                                                                                                                                                                                                                                                                                                                                                                                                                                                                                                                                                                                                                                                                                                                                                                                                                                                                                                                                                                                                    | 32,361  |
| 14 | harm reduction                                                                                                                                                                                                                                                                                                                                                                                                                                                                                                                                                                                                                                                                                                                                                                                                                                                                                                                                                                                                                                                                                                                                                    | 6,054   |
| 15 | ((patient* or user*) n3 (experience* or perspective* or opinion* or view* or attitude* or voice* or feedback))                                                                                                                                                                                                                                                                                                                                                                                                                                                                                                                                                                                                                                                                                                                                                                                                                                                                                                                                                                                                                                                    | 126,038 |
| 16 | (S9 or S10) and (s11 or s12 or s13 or s14 or s15)                                                                                                                                                                                                                                                                                                                                                                                                                                                                                                                                                                                                                                                                                                                                                                                                                                                                                                                                                                                                                                                                                                                 | 7,061   |
| 17 | ((opioid* or opiate*) n3 (disorder* or depend* or withdraw* or overdos* or postoverdos*) n5 treat*)                                                                                                                                                                                                                                                                                                                                                                                                                                                                                                                                                                                                                                                                                                                                                                                                                                                                                                                                                                                                                                                               | 2,967   |
| 18 | (MH "Emergency Service+")                                                                                                                                                                                                                                                                                                                                                                                                                                                                                                                                                                                                                                                                                                                                                                                                                                                                                                                                                                                                                                                                                                                                         | 63,344  |
| 19 | (MH "Emergency Medicine")                                                                                                                                                                                                                                                                                                                                                                                                                                                                                                                                                                                                                                                                                                                                                                                                                                                                                                                                                                                                                                                                                                                                         | 12,788  |
| 20 | (MH "Emergency Nursing")                                                                                                                                                                                                                                                                                                                                                                                                                                                                                                                                                                                                                                                                                                                                                                                                                                                                                                                                                                                                                                                                                                                                          | 14,530  |
| 21 | (emergency n3 (department* or ward* or unit* or room* or service* or medicine or center* or centre* or clinic or clinics or hospital* or care or visit* or patient*))                                                                                                                                                                                                                                                                                                                                                                                                                                                                                                                                                                                                                                                                                                                                                                                                                                                                                                                                                                                             | 159798  |
| 22 | (casualty n1 (department* or ward* or unit* or room* or service* or medicine or center* or centre* or clinic or clinics or hospital* or visit* or patient*))                                                                                                                                                                                                                                                                                                                                                                                                                                                                                                                                                                                                                                                                                                                                                                                                                                                                                                                                                                                                      | 289     |
| 23 | S18 OR S19 OR S20 OR S21 OR S22                                                                                                                                                                                                                                                                                                                                                                                                                                                                                                                                                                                                                                                                                                                                                                                                                                                                                                                                                                                                                                                                                                                                   | 171212  |

|    |                                                            |       |
|----|------------------------------------------------------------|-------|
| 24 | S3 OR S8 OR S16 OR S17                                     | 12359 |
| 25 | S23 AND S24                                                | 714   |
| 26 | S23 AND S24 (Limiters - Published Date: 20100101-20211231) | 643   |

## IBSS

|     |                                                                                                                                                                                                                                                                                                                                                                                                                                                                                                                                                                                                                                                                                                                                                                                                                                                                                                                                                                                                                                                                                                                                                                              |        |
|-----|------------------------------------------------------------------------------------------------------------------------------------------------------------------------------------------------------------------------------------------------------------------------------------------------------------------------------------------------------------------------------------------------------------------------------------------------------------------------------------------------------------------------------------------------------------------------------------------------------------------------------------------------------------------------------------------------------------------------------------------------------------------------------------------------------------------------------------------------------------------------------------------------------------------------------------------------------------------------------------------------------------------------------------------------------------------------------------------------------------------------------------------------------------------------------|--------|
| 1.  | noft((buprenorphine or burprex or suboxone or brixadi or bunavail or buprenex or butrans or buvidal or cizdol or norspan or prefin or probuphine or sublocade or subutex or temgesic or zubsolv))                                                                                                                                                                                                                                                                                                                                                                                                                                                                                                                                                                                                                                                                                                                                                                                                                                                                                                                                                                            | 347    |
| 2.  | noft(((opioid* or opiate*) NEAR/3 (replacement or substitution or maintenance)))                                                                                                                                                                                                                                                                                                                                                                                                                                                                                                                                                                                                                                                                                                                                                                                                                                                                                                                                                                                                                                                                                             | 391    |
| 3.  | noft(((opioid* or opiate*) NEAR/3 (maintenance or substitution or replacement) NEAR/3 (treatment or therap*)))                                                                                                                                                                                                                                                                                                                                                                                                                                                                                                                                                                                                                                                                                                                                                                                                                                                                                                                                                                                                                                                               | 353    |
| 4.  | noft(Opioid agonist* NEAR/3 (treatment* or therap*))                                                                                                                                                                                                                                                                                                                                                                                                                                                                                                                                                                                                                                                                                                                                                                                                                                                                                                                                                                                                                                                                                                                         | 115    |
| 5.  | noft(("medically assisted" OR "opioid assisted") NEAR/3 (treatment* OR therap*))                                                                                                                                                                                                                                                                                                                                                                                                                                                                                                                                                                                                                                                                                                                                                                                                                                                                                                                                                                                                                                                                                             | 8      |
| 6.  | noft(((opioid* or opiate* or abstral or atasol or avinza or buprenorphine or butorphanol or butrans or coactifed or codeine or cotridin or covan or demerol or dextropropoxyphene or dihydrocodeine or dilaudid or diphenoxylate or doloral or duragesic or durela or empracet or emtec or endocet or endodan or fentanil or fentanyl or fentora or fiorinal or heroin or hycodan or hydrocodone or hydromorph* or jurnista or kadian or lenoltec or levorphanol or lomotil or lorcet or lortab or meperidine or "m-eslon" or metadol or methado or methadone or morphine or "ms contin" or "ms-ir" or nalbuphine or novahist or nubain or nucynta or opana or "oxy.ir" or oxyco or oxycodone or oxycontin or "oxy-ir" or oxymorphone or oxyneo or pentazocine or percocet or percodan or pethidine or procet or propoxyphene or ralivia or rivacocet or sepeudol or stadol or statex or suboxone or talwin or tapentadol or targin or tecnal or tramacet or tramadol or tridural or tussionex or ultram or vicodin or zytram) NEAR/3 (depend* or disorder* or "use" or user* or using or misus* or abuse* or abusi* or addict* or withdraw* or overdos* or postoverdos*)) ) | 2,317  |
| 7.  | noft(((overdos* or postoverdos*) and (opioid* or opiate*)) )                                                                                                                                                                                                                                                                                                                                                                                                                                                                                                                                                                                                                                                                                                                                                                                                                                                                                                                                                                                                                                                                                                                 | 442    |
| 8.  | noft(((initiat* or pathway* or enroll* or start* or accept* or reject* or refus* or consider* or link* or facilitat* or access* or connect* or discuss* or conversation* or present* or admit* or admission* or administer* or deliver*) NEAR/5 (care or treat* or therap* or service* or intervention* or program*)) )                                                                                                                                                                                                                                                                                                                                                                                                                                                                                                                                                                                                                                                                                                                                                                                                                                                      | 76,758 |
| 9.  | noft(((implement* or initiat* or induction) NEAR/3 pathway*)) )                                                                                                                                                                                                                                                                                                                                                                                                                                                                                                                                                                                                                                                                                                                                                                                                                                                                                                                                                                                                                                                                                                              | 109    |
| 10. | noft(((barrier* or facilitat*) NEAR/3 (care or treat* or therap* or pathway* or service* or intervention* or program*)) )                                                                                                                                                                                                                                                                                                                                                                                                                                                                                                                                                                                                                                                                                                                                                                                                                                                                                                                                                                                                                                                    | 4,403  |
| 11. | noft(harm reduction )                                                                                                                                                                                                                                                                                                                                                                                                                                                                                                                                                                                                                                                                                                                                                                                                                                                                                                                                                                                                                                                                                                                                                        | 1,899  |
| 12. | noft( ((patient* or user*) NEAR/3 (experience* or perspective* or opinion* or view* or attitude* or voice* or feedback)))                                                                                                                                                                                                                                                                                                                                                                                                                                                                                                                                                                                                                                                                                                                                                                                                                                                                                                                                                                                                                                                    | 4,964  |



13. noft(((opioid\* OR opiate\*) NEAR/3 (replacement OR substitution OR maintenance))) OR noft(((opioid\* OR opiate\*) NEAR/3 (maintenance OR substitution OR replacement) NEAR/3 (treatment OR therap\*))) OR (Opioid agonist\* NEAR/3 (treatment\* or therap\*)) OR noft(("medically assisted" OR "opioid assisted") NEAR/3 (treatment\* OR therap\*)) 504
14. noft(((opioid\* OR opiate\* OR abstral OR atasol OR avinza OR buprenorphine OR butorphanol OR butrans OR coactifed OR codeine OR cotridin OR covan OR demerol OR dextropropoxyphene OR dihydrocodeine OR dilaudid OR diphenoxylate OR doloral OR duragesic OR durela OR empracet OR emtec OR endocet OR endodan OR fentanil OR fentanyl OR fentora OR fiorinal OR heroin OR hycodan OR hydrocodone OR hydromorph\* OR jurnista OR kadian OR lenoltec OR levorphanol OR lomotil OR lorcet OR lortab OR meperidine OR "m-eslon" OR metadol OR methado OR methadone OR morphine OR "ms contin" OR "ms-ir" OR nalbuphine OR novahist OR nubain OR nucynta OR opana OR "oxy.ir" OR oxyco OR oxycodone OR oxycontin OR "oxy-ir" OR oxymorphone OR oxyneo OR pentazocine OR percocet OR percodan OR pethidine OR procet OR propoxyphene OR ralivia OR rivacocet OR sepeudol OR stadol OR statex OR suboxone OR talwin OR tapentadol OR targin OR tecnal OR tramacet OR tramadol OR tridural OR tussionex OR ultram OR vicodin OR zytram) NEAR/3 (depend\* OR disorder\* OR "use" OR user\* OR using OR misus\* OR abuse\* OR abusi\* OR addict\* OR withdraw\* OR overdos\* OR postoverdos\*))) OR noft(((overdos\* OR postoverdos\*) AND (opioid\* OR opiate\*))) 2,375
15. noft(((initiat\* OR pathway\* OR enroll\* OR start\* OR accept\* OR reject\* OR refus\* OR consider\* OR link\* OR facilitat\* OR access\* OR connect\* OR discuss\* OR conversation\* OR present\* OR admit\* OR admission\* OR administer\* OR deliver\*) NEAR/5 (care OR treat\* OR therap\* OR service\* OR intervention\* OR program\*)) OR noft(((implement\* OR initiat\* OR induction) NEAR/3 pathway\*)) OR noft(((barrier\* OR facilitat\*) NEAR/3 (care OR treat\* OR therap\* OR pathway\* OR service\* OR intervention\* OR program\*)) OR noft(harm reduction) OR noft(((patient\* OR user\*) NEAR/3 (experience\* OR perspective\* OR opinion\* OR view\* OR attitude\* OR voice\* OR feedback))) 83,272
16. (noft(((opioid\* OR opiate\* OR abstral OR atasol OR avinza OR buprenorphine OR butorphanol OR butrans OR coactifed OR codeine OR cotridin OR covan OR demerol OR dextropropoxyphene OR dihydrocodeine OR dilaudid OR diphenoxylate OR doloral OR duragesic OR durela OR empracet OR emtec OR endocet OR endodan OR fentanyl OR fentanyl OR fentora OR fiorinal OR heroin OR hycodan OR hydrocodone OR hydromorph\* OR jurnista OR kadian OR lenoltec OR levorphanol OR lomotil OR lorcet OR Lortab OR meperidine OR "m-eslon" OR metadol OR methado OR methadone OR morphine OR "ms contin" OR "ms-ir" OR nalbuphine OR novahist OR nubain OR nucynta OR opana OR "oxy.ir" OR oxyco OR oxycodone OR oxycontin OR "oxy-ir" OR oxymorphone OR oxyneo OR pentazocine ORpercocet OR percodan OR pethidine OR procet ORpropoxyphene OR ralivia OR rivacocet OR sepeudol OR stadol OR statex OR suboxone OR talwin OR tapentadol OR targin OR tecnal OR tramacet OR tramadol OR tridural OR tussionex OR ultram OR vicodin OR zytram) NEAR/3 (depend\* OR disorder\* OR "use" OR user\* OR using OR misus\* OR abuse\* OR



- abusi\* OR addict\* OR withdraw\* OR overdos\* OR postoverdos\*)) OR  
noft(((overdos\* OR postoverdos\*) AND (opioid\* OR opiate\*))) AND(noft(((initiat\*  
OR pathway\* OR enroll\* OR start\* OR accept\* OR reject\* OR refus\* OR  
consider\* OR link\* OR facilitat\* OR access\* OR connect\* OR discuss\* OR  
conversation\* OR present\* OR admit\* OR admission\* OR administer\* OR  
deliver\*) NEAR/5 (care OR treat\* OR therap\* OR service\* OR intervention\* OR  
program\*)) OR noft(((implement\* OR initiat\* OR induction) NEAR/3pathway\*))  
OR noft(((barrier\* OR facilitat\*) NEAR/3 (care OR treat\* OR therap\* OR pathway\*  
OR service\* OR intervention\* OR program\*)) OR noft(harm reduction) OR  
noft(((patient\* OR user\*) NEAR/3 (experience\* OR perspective\* OR opinion\*  
OR view\* OR attitude\* OR voice\*OR feedback)))) 722
17. noft((buprenorphine OR burprex OR suboxone OR brixadi OR bunavail OR  
buprenex OR butrans OR buvidal OR cizdol OR norspan OR prefin OR  
probuphine OR sublocade OR subutex OR temgesic OR zubsolv))  
OR(noft(((opioid\* OR opiate\*) NEAR/3 (replacement OR substitution OR  
maintenance))) OR noft(((opioid\* OR opiate\*) NEAR/3 (maintenance OR  
substitution OR replacement) NEAR/3 (treatment OR therap\*)) OR  
(Opioidagonist\* NEAR/3 (treatment\* or therap\*)) OR noft(("medically assisted"  
OR "opioid assisted") NEAR/3 (treatment\* OR therap\*)) OR ((noft(((opioid\* OR  
opiate\*OR abstral OR atazol OR avinza OR buprenorphine OR butorphanol OR  
butrans OR coactifed OR codeine OR cotridin OR covan OR demerol OR  
dextropropoxyphene OR dihydrocodeine OR dilaudid OR diphenoxylate OR  
doloral OR duragesic OR durela OR empracet OR emtec OR endocet OR  
endodan OR fentanil OR fentanyl OR fentora OR fiorinal OR heroin OR hycodan  
OR hydrocodone OR hydromorph\* OR jurnista OR kadian OR lenoltec OR  
levorphanol OR lomotil OR lorcet OR lortab OR meperidine OR "m-eslon" OR  
metadol OR methado OR methadone OR morphine OR "ms contin" OR "ms-ir"  
OR nalbuphine OR novahist OR nubain OR nucynta OR opana OR "oxy.ir" OR  
oxyco OR oxycodone OR oxycontin OR "oxy-ir" OR oxymorphone OR oxyneo OR  
pentazocine OR percocet OR percodan OR pethidine OR procet OR  
propoxyphene OR ralivia OR rivacocet OR sepeudol OR stadol OR statex OR  
suboxone OR talwin OR tapentadol OR targin OR tecnal OR tramacet OR  
tramadol OR tridural OR tussionex OR ultram OR vicodin OR zytram) NEAR/3  
(depend\* OR disorder\* OR "use" OR user\* OR using OR misus\* OR abuse\* OR  
abusi\* OR addict\* OR withdraw\* OR overdos\*OR postoverdos\*)) OR  
noft(((overdos\* OR postoverdos\*) AND (opioid\* OR opiate\*))) AND (noft(((initiat\*  
OR pathway\* OR enroll\* OR start\* OR accept\* OR reject\* OR refus\* OR  
consider\* OR link\* OR facilitat\* OR access\* OR connect\* OR discuss\* OR  
conversation\* OR present\* OR admit\* OR admission\* OR administer\* OR  
deliver\*)NEAR/5 (care OR treat\* OR therap\* OR service\* OR intervention\* OR  
program\*)) OR noft(((implement\* OR initiat\* OR induction) NEAR/3 pathway\*))  
OR noft(((barrier\* OR facilitat\*) NEAR/3 (care OR treat\* OR therap\* OR pathway\*  
OR service\* OR intervention\* OR program\*)) OR noft(harm reduction) OR  
noft(((patient\*OR user\*) NEAR/3 (experience\* OR perspective\* OR opinion\* OR  
view\* OR attitude\* OR voice\* OR feedback)))) 1,247

18. noft(((opioid\* or opiate\*) NEAR/3 (disorder\* or depend\* or withdraw\* or overdos\* or postoverdos\*) NEAR/5 treat\*)) 335
19. (noft((buprenorphine OR burprex OR suboxone OR brixadi OR bunavail OR buprenex OR butrans OR buvidal OR cizdol OR norspan OR prefin OR probuphine OR sublocade OR subutex OR temgesic OR subsolv)) OR (noft(((opioid\* OR opiate\*) NEAR/3 (replacement OR substitution OR maintenance))) OR noft(((opioid\* OR opiate\*) NEAR/3 (maintenance OR substitution OR replacement) NEAR/3 (treatment OR therap\*))) OR (Opioid agonist\* NEAR/3 (treatment\* or therap\*)) OR noft(("medically assisted" OR "opioid assisted") NEAR/3 (treatment\* OR therap\*)) OR ((noft(((opioid\* OR opiate\* OR abstral OR atadol OR avinza OR buprenorphine OR butorphanol OR butrans OR coactifed OR codeine OR cotridin OR covan OR demerol OR dextropropoxyphene OR dihydrocodeine OR dilaudid OR diphenoxylate OR doloral OR duragesic OR durela OR empracet OR emtec OR endocet OR endodan OR fentanil OR fentanyl OR fentora OR fiorinal OR heroin OR hycodan OR hydrocodone OR hydromorph\* OR jurnista OR kadian OR lenoltec OR levorphanol OR lomofil OR lorcet OR lortab OR meperidine OR "m-eslon" OR metadol OR methado OR methadone OR morphine OR "ms contin" OR "ms-ir" OR nalbuphine OR novahist OR nubain OR nucynta OR opana OR "oxy.ir" OR oxyco OR oxycodone OR oxycontin OR "oxy-ir" OR oxymorphone OR oxyneo OR pentazocine OR percocet OR percodan OR pethidine OR procet OR propoxyphene OR ralivia OR rivacocet OR sepeudol OR stadol OR statex OR suboxone OR talwin OR tapentadol OR targin OR tecnal OR tramacet OR tramadol OR tridural OR tussionex OR ultram OR vicodin OR zytram) NEAR/3 (depend\* OR disorder\* OR "use" OR user\* OR using OR misus\* OR abuse\* OR abusi\* OR addict\* OR withdraw\* OR overdos\* OR postoverdos\*))) OR noft(((overdos\* OR postoverdos\*) AND (opioid\* OR opiate\*))) AND (noft(((initiat\* OR pathway\* OR enroll\* OR start\* OR accept\* OR reject\* OR refus\* OR consider\* OR link\* OR facilitat\* OR access\* OR connect\* OR discuss\* OR conversation\* OR present\* OR admit\* OR admission\* OR administer\* OR deliver\*) NEAR/5 (care OR treat\* OR therap\* OR service\* OR intervention\* OR program\*))) OR noft(((implement\* OR initiat\* OR induction) NEAR/3 pathway\*)) OR noft(((barrier\* OR facilitat\*) NEAR/3 (care OR treat\* OR therap\* OR pathway\* OR service\* OR intervention\* OR program\*))) OR noft(harm reduction) OR noft(((patient\* OR user\*) NEAR/3 (experience\* OR perspective\* OR opinion\* OR view\* OR attitude\* OR voice\* OR feedback)))))) OR noft(((opioid\* OR opiate\*) NEAR/3 (disorder\* OR depend\* OR withdraw\* OR overdos\* OR postoverdos\*) NEAR/5 treat\*)) 1,346
20. noft((emergency NEAR/3 (department\* or ward\* or unit\* or room\* or service\* or medicine or center\* or centre\* or clinic or clinics or hospital\* or care or visit\* or patient\*)) ) 2,880
21. noft( (casualty NEAR/1 (department\* or ward\* or unit\* or room\* or service\* or medicine or center\* or centre\* or clinic or clinics or hospital\* or visit\* or patient\*)) ) 27
22. noft("a&e") 3,134
23. noft("emergency nurs\*") 3

|     |                                                                                                          |         |
|-----|----------------------------------------------------------------------------------------------------------|---------|
| 24. | 1 OR 2 OR 3 OR 4 OR 5 OR 6 OR 7 OR 8 OR 9 OR 10 OR 11 OR 12 OR 13 OR<br>14 OR 15 OR 16 OR 17 OR 18 OR 19 | 108,909 |
| 25. | 20 OR 21 OR 22 OR 23                                                                                     | 6,015   |
| 26. | 24 AND 25                                                                                                | 47      |
| 27. | 24 and 25 (limit 1995-2021)                                                                              | 25      |
