# Supplementary material for: Facilitators of and barriers to buprenorphine initiation for people with opioid use disorder in the emergency department: protocol for a scoping review
Source: HighWire-hosted journal article supplement (doi:10.1136/bmjopen-2021-053207), 2021-09-01
Supplement: bmjopen-2021-053207supp002_data_supplement.pdf [file bmjopen-2021-053207supp002_data_supplement.pdf]

## Appendix 2. Eligibility Criteria

1. Does this publication report about the emergency department or acute care setting?
  - a. YES
  - b. NO
  - c. UNCLEAR
  
2. Does this publication focus on the initiation of buprenorphine-naloxone (Suboxone), medically assisted therapy, replacement therapy, or a harm reduction strategy to support continuity of care?
  - a. YES
  - b. NO
  - c. UNCLEAR
  
3. Is the intervention used within the context of opioid use disorder and overdose?
  - a. YES
  - b. NO
  - c. UNCLEAR
